# Supplementary material
Source: HighWire-hosted journal article supplement (https://care.diabetesjournals.org/content/suppl/2008/01/15/dc07-1829)
Supplement: dc071829onlineappendix.pdf [file dc071829onlineappendix.pdf]

## **Appendix**

### *Women's Health Initiative Investigators*

*Program Office:* (National Heart, Lung, and Blood Institute, Bethesda, Maryland)

Elizabeth Nabel, Jacques Rossouw, Shari Ludlam, Linda Pottern, Joan McGowan, Leslie Ford, and Nancy Geller.

*Clinical Coordinating Center:* (Fred Hutchinson Cancer Research Center, Seattle,

WA) Ross Prentice, Garnet Anderson, Andrea LaCroix, Charles L. Kooperberg, Ruth E.

Patterson, Anne McTiernan; (Wake Forest University School of Medicine, Winston-

Salem, NC) Sally Shumaker; (Medical Research Labs, Highland Heights, KY) Evan

Stein; (University of California at San Francisco, San Francisco, CA) Steven Cummings.

*Clinical Centers:* (Albert Einstein College of Medicine, Bronx, NY) Sylvia Wassertheil-

Smoller; (Baylor College of Medicine, Houston, TX) Aleksandar Rajkovic; (Brigham and

Women's Hospital, Harvard Medical School, Boston, MA) JoAnn Manson; (Brown

University, Providence, RI) Annlouise R. Assaf; (Emory University, Atlanta, GA)

Lawrence Phillips; (Fred Hutchinson Cancer Research Center, Seattle, WA) Shirley

Beresford; (George Washington University Medical Center, Washington, DC) Judith

Hsia; (Los Angeles Biomedical Research Institute at Harbor- UCLA Medical Center,

Torrance, CA) Rowan Chlebowski; (Kaiser Permanente Center for Health Research,

Portland, OR) Evelyn Whitlock; (Kaiser Permanente Division of Research, Oakland, CA)

Bette Caan; (Medical College of Wisconsin, Milwaukee, WI) Jane Morley Kotchen;  
(MedStar Research Institute/Howard University, Washington, DC) Barbara V. Howard;  
(Northwestern University, Chicago/Evanston, IL) Linda Van Horn; (Rush Medical  
Center, Chicago, IL) Henry Black; (Stanford Prevention Research Center, Stanford, CA)  
Marcia L. Stefanick; (State University of New York at Stony Brook, Stony Brook, NY)  
Dorothy Lane; (The Ohio State University, Columbus, OH) Rebecca Jackson; (University  
of Alabama at Birmingham, Birmingham, AL) Cora E. Lewis; (University of Arizona,  
Tucson/Phoenix, AZ) Tamsen Bassford; (University at Buffalo, Buffalo, NY) Jean  
Wactawski-Wende; (University of California at Davis, Sacramento, CA) John Robbins;  
(University of California at Irvine, CA) F. Allan Hubbell; (University of California at Los  
Angeles, Los Angeles, CA) Lauren Nathan; (University of California at San Diego,  
LaJolla/Chula Vista, CA) Robert D. Langer; (University of Cincinnati, Cincinnati, OH)  
Margery Gass; (University of Florida, Gainesville/Jacksonville, FL) Marian Limacher;  
(University of Hawaii, Honolulu, HI) David Curb; (University of Iowa, Iowa  
City/Davenport, IA) Robert Wallace; (University of Massachusetts/Fallon Clinic,  
Worcester, MA) Judith Ockene; (University of Medicine and Dentistry of New Jersey,  
Newark, NJ) Norman Lasser; (University of Miami, Miami, FL) Mary Jo O'Sullivan;  
(University of Minnesota, Minneapolis, MN) Karen Margolis; (University of Nevada,  
Reno, NV) Robert Brunner; (University of North Carolina, Chapel Hill, NC) Gerardo  
Heiss; (University of Pittsburgh, Pittsburgh, PA) Lewis Kuller; (University of Tennessee,  
Memphis, TN) Karen C. Johnson; (University of Texas Health Science Center, San  
Antonio, TX) Robert Brzyski; (University of Wisconsin, Madison, WI) Gloria E. Sarto;  
(Wake Forest University School of Medicine, Winston-Salem, NC) Denise Bonds;

(Wayne State University School of Medicine/Hutzel Hospital, Detroit, MI) Susan  
Hendrix.
